# Supplementary material
Source: PubMed Central journal article supplement (PMC4378690)
Supplement: NIHMS614076-supplement-Supplementary_Tables_1-2_and_legends.pdf [file NIHMS614076-supplement-Supplementary_Tables_1-2_and_legends.pdf]

Suppl Table 1. The altered functional groups associated with the top three networks using 115 differentially expressed genes ( $p < 0.001$ ) between sensitive and resistant cells. IPA tool was used to elucidate the significantly altered pathways between sensitive and resistant cells.

Suppl Table 2. Genes with significant difference between sensitive and resistant cells ( $p < 0.001$ ).

Suppl Table 3. Correlation analysis between GI50s of therapeutic reagents and gene expression.

Suppl Figure 1. Cluster analysis of pancreatic cancer cells. Unsupervised cluster analysis of the 6127 genes that were differentially expressed in at least two arrays with at least a two- fold change (average linkage clustering).

Suppl Figure 2. Migratory potential of pancreatic cancer cells.  $1.0 \times 10^5$  cells were added to chamber and allowed to migrate in matrigel for 6 hours at 37 °C in a 5% CO<sub>2</sub> atmosphere. The non-migrated cells on the upper surface of the membrane were removed and the migrated cells on the lower surface of the membrane were counted. Data shown are mean  $\pm$  SEM for three experiments.

Suppl Figure 3. Expression profiling of four additional cell lines (T3M4, Colo357, Capan1, Suit2) showed clustering with sensitive or resistant sub-types in Fig 2A

according to their drug sensitivity. Unsupervised cluster analysis of the 4809 genes that were differentially expressed in at least two arrays with at least a two- fold change (average linkage clustering).

Suppl Figure 4. The expression patterns of E-cadherin transcriptional factors. Heat map includes the expression of Snail, Slug, Twist and Sip1 and demonstrated no correlation of those transcriptional factors and E-cadherin expression / drug sensitivity.

Suppl Figure 5. Log<sub>10</sub>(GI<sub>50</sub>) values of Taxol were plotted. If log<sub>10</sub>(GI<sub>50</sub>) of the cell lines were below the mean of log<sub>10</sub>(GI<sub>50</sub>) across the panel of cells, the cell lines were defined as sensitive, whereas resistant cell lines had log<sub>10</sub>(GI<sub>50</sub>) values above the mean.

Suppl Figure 6. Cluster analysis of ABC transporter pathway genes in the array. The average number of duplicates was used for clustering analysis. High expressed genes are in red and low expressed genes are in green.

Suppl. Table 1

|   | Score | Associated Network functions                                                           | Focus molecules |
|---|-------|----------------------------------------------------------------------------------------|-----------------|
| 1 | 46    | Cellular Comprise, Cellular movement, Cancer                                           | 22              |
| 2 | 32    | Cellular Development, lipid metabolism, Molecular Transport                            | 16              |
| 3 | 22    | Developmental disorder, Reproductive system disease, Cellular Growth and proliferation | 12              |

Suppl. Table 2

| Ranking | p-value   | Accession      | Symbol    | Fold-change (S/R)* |
|---------|-----------|----------------|-----------|--------------------|
| 1       | < 1e-07   | NM_000064.1    | C3        | 13.88              |
| 2       | < 1e-07   | NM_024572.2    | GALNT14   | 5.11               |
| 3       | 0.0000013 | XM_936226.1    | LOC653879 | 6.34               |
| 4       | 0.0000016 | NM_173853.2    | KRTCAP3   | 10.17              |
| 5       | 0.0000021 | NM_004105.2    | EFEMP1    | 13.33              |
| 6       | 0.0000022 | NM_025079.1    | ZC3H12A   | 6.29               |
| 7       | 0.0000066 | NM_001017970.1 | TMEM30B   | 22.11              |
| 8       | 0.0000079 | NM_052886.1    | MAL2      | 40.21              |
| 9       | 0.000014  | NM_033294.2    | CASP1     | 9.89               |
| 10      | 0.0000321 | NM_002773.2    | PRSS8     | 16.17              |
| 11      | 0.0000407 | NM_002754.3    | MAPK13    | 15.16              |
| 12      | 0.0000455 | NM_181054.1    | HIF1A     | 3.42               |
| 13      | 0.0000475 | NM_002961.2    | S100A4    | -35.16             |
| 14      | 0.0000479 | NM_004208.2    | PDCD8     | -1.78              |
| 15      | 0.0000544 | NM_001530.2    | HIF1A     | 3.81               |
| 16      | 0.0000568 | NM_015054.1    | KIAA0701  | -1.76              |
| 17      | 0.0000593 | NM_003588.2    | CUL4B     | -1.81              |
| 18      | 0.0000642 | NM_178564.2    | NRBP2     | -3.80              |
| 19      | 0.0000643 | NM_203304.1    | RKHD1     | -1.94              |
| 20      | 0.0000659 | NM_030941.1    | LOC81691  | -2.09              |
| 21      | 0.0000684 | AK056642       |           | 1.51               |
| 22      | 0.0000806 | NM_001002860.2 | BTBD7     | 1.71               |
| 23      | 0.0000807 | NM_145168.1    | HSPC105   | 2.15               |
| 24      | 0.000091  | NM_001010877.2 | ZNF311    | 2.05               |
| 25      | 0.0000923 | XM_941913.1    | LOC652461 | 1.53               |
| 26      | 0.0000994 | NM_012395.2    | PFTK1     | 2.83               |
| 27      | 0.0001005 | NM_014725.2    | STARD8    | -2.47              |
| 28      | 0.0001107 | NM_000391.2    | TPP1      | -2.13              |
| 29      | 0.0001109 | NM_201525.1    | GPR56     | 15.71              |
| 30      | 0.0001142 | XM_498810.2    | LOC440667 | 1.85               |
| 31      | 0.0001171 | XR_001113.1    | LOC554223 | 2.77               |
| 32      | 0.0001379 | XR_001114.1    | LOC554223 | 1.59               |
| 33      | 0.0001429 | NM_032415.2    | CARD11    | 7.71               |
| 34      | 0.0001454 | NM_001013622.1 | FAM53A    | -2.41              |
| 35      | 0.0001514 | NM_020877.2    | DNHD3     | 3.89               |
| 36      | 0.0001632 | NM_002638.2    | PI3       | 26.58              |
| 37      | 0.0001654 | NM_033008.1    | PCBP4     | -2.19              |
| 38      | 0.0001677 | NM_032316.2    | NICN1     | -2.36              |
| 39      | 0.0001731 | NM_022337.1    | RAB38     | 19.97              |

|    |           |                |               |       |
|----|-----------|----------------|---------------|-------|
| 40 | 0.0001737 | NM_024938.2    | PCNXL2        | 2.20  |
| 41 | 0.0002007 | NM_001031699.1 | MOXD1         | 1.88  |
| 42 | 0.0002141 | NM_003492.1    | CXorf12       | -2.07 |
| 43 | 0.0002194 | NM_172104.1    | EYA4          | 3.02  |
| 44 | 0.0002223 | NM_149379.1    | NSUN5C        | -1.57 |
| 45 | 0.0002336 | BG434785       |               | 2.27  |
| 46 | 0.0002358 | NM_018991.2    | DKFZP434A0131 | -2.02 |
| 47 | 0.0002622 | NM_031904.2    | FKSG44        | -2.08 |
| 48 | 0.0002781 | XM_939187.1    | HSGT1         | -1.86 |
| 49 | 0.0002805 | NM_015529.1    | MOXD1         | 2.75  |
| 50 | 0.0002887 | XM_930884.1    | LOC653080     | -1.67 |
| 51 | 0.0002956 | NM_199161.1    | SAA1          | 11.55 |
| 52 | 0.0003115 | NM_182620.1    | FAM33A        | 2.02  |
| 53 | 0.0003432 | AL049435       |               | 10.50 |
| 54 | 0.0003509 | NM_002845.2    | PTPRM         | 3.98  |
| 55 | 0.0003526 | NM_015888.3    | HOOK1         | 7.46  |
| 56 | 0.0003606 | NM_138376.1    | TTC5          | 1.89  |
| 57 | 0.0003643 | NM_002577.3    | PAK2          | -1.94 |
| 58 | 0.000371  | NM_024930.1    | ELOVL7        | 2.84  |
| 59 | 0.0003793 | NM_023915.2    | GPR87         | 10.33 |
| 60 | 0.0003939 | NM_175924.2    | ILDR1         | 4.99  |
| 61 | 0.0004018 | NM_016069.8    | Magmas        | -1.62 |
| 62 | 0.0004074 | NM_006674.2    | HCP5          | 12.47 |
| 63 | 0.0004337 | NM_024420.1    | PLA2G4A       | 11.13 |
| 64 | 0.0004363 | NM_144975.2    | MGC19764      | 2.43  |
| 65 | 0.0004428 | NM_001392.3    | DTNA          | 2.84  |
| 66 | 0.0004707 | NM_020335.1    | VANGL2        | 4.04  |
| 67 | 0.0004811 | CN362099       |               | 1.84  |
| 68 | 0.0004947 | NM_033317.2    | ZD52F10       | 9.32  |
| 69 | 0.0004976 | NM_181642.2    | SPINT1        | 3.69  |
| 70 | 0.0005117 | NM_001005474.1 | NFKBIZ        | 5.07  |
| 71 | 0.000539  | NM_014824.1    | FCHSD2        | -1.58 |
| 72 | 0.0005453 | NM_003363.2    | USP4          | -1.60 |
| 73 | 0.0005732 | NM_015065.1    | EXPH5         | 3.01  |
| 74 | 0.0005739 | NM_007131.2    | ZNF75         | -1.58 |
| 75 | 0.0005884 | NM_005449.3    | FAIM3         | 2.53  |
| 76 | 0.0005934 | NM_181501.1    | ITGA1         | 2.78  |
| 77 | 0.0005978 | NM_013230.2    | CD24          | 4.29  |
| 78 | 0.0005981 | NM_003384.2    | VRK1          | 1.67  |
| 79 | 0.0006003 | NM_001560.2    | IL13RA1       | -2.86 |
| 80 | 0.0006005 | NM_006927.2    | ST3GAL2       | -1.90 |
| 81 | 0.0006041 | NM_138446.1    | C7orf30       | -1.53 |
| 82 | 0.0006165 | NM_030754.2    | SAA2          | 10.94 |

|     |           |                |           |        |
|-----|-----------|----------------|-----------|--------|
| 83  | 0.0006407 | NM_001025202.1 | LOC442582 | -1.84  |
| 84  | 0.0006433 | NM_015262.1    | FAM21C    | -1.52  |
| 85  | 0.0006545 | NM_019045.3    | WDR44     | -1.64  |
| 86  | 0.0006554 | NM_000998.3    | RPL37A    | -1.95  |
| 87  | 0.0006571 | AK128481       |           | -2.40  |
| 88  | 0.0006584 | NM_002531.1    | NTSR1     | -21.96 |
| 89  | 0.0006604 | NM_004580.3    | RAB27A    | 1.62   |
| 90  | 0.0006689 | NM_001009944.1 | PKD1      | -2.12  |
| 91  | 0.0006891 | BC034319       |           | 7.58   |
| 92  | 0.0006951 | NM_015020.2    | PHLPPL    | -2.53  |
| 93  | 0.0007028 | NM_148980.1    | NSUN5C    | -1.63  |
| 94  | 0.0007044 | NM_003253.1    | TIAM1     | 1.69   |
| 95  | 0.0007079 | NM_006458.2    | TRIM3     | -1.75  |
| 96  | 0.0007176 | XM_942130.1    | KCMF1     | -1.54  |
| 97  | 0.0007225 | NM_018719.2    | CDCA7L    | 2.21   |
| 98  | 0.0007575 | NM_144590.1    | ANKRD22   | 5.74   |
| 99  | 0.0007596 | NM_002067.1    | GNA11     | -1.55  |
| 100 | 0.0007649 | XM_930678.1    | LOC642441 | 2.66   |
| 101 | 0.000787  | NM_003082.2    | SNAPC1    | 1.99   |
| 102 | 0.000793  | NM_138786.1    | TM4SF18   | -18.79 |
| 103 | 0.0008124 | NM_006405.5    | TM9SF1    | 2.19   |
| 104 | 0.0008266 | NM_024826.1    | FLJ21159  | 4.64   |
| 105 | 0.000828  | NM_014504.1    | RABGEF1   | -2.33  |
| 106 | 0.0008297 | NM_018650.2    | MARK1     | 2.36   |
| 107 | 0.0008562 | NM_001017430.1 | RBM3      | -1.93  |
| 108 | 0.0008582 | XM_943927.1    | LOC653977 | -1.55  |
| 109 | 0.0008863 | NM_148956.1    | NSUN5     | -1.69  |
| 110 | 0.0008915 | CF454867       |           | 2.34   |
| 111 | 0.0009018 | NM_001031740.1 | MANEAL    | -2.09  |
| 112 | 0.0009073 | NM_032630.2    | CINP      | 1.53   |
| 113 | 0.0009086 | NM_021008.2    | DEAF1     | -1.55  |
| 114 | 0.0009646 | NM_005102.1    | FEZ2      | -2.27  |
| 115 | 0.0009943 | NM_007257.4    | PNMA2     | -9.72  |

\*S/R: Sensitive cells/Resistant cells
